# Supplementary material
Source: PubMed Central journal article supplement (PMC3677445)
Supplement: 1307185110_pnas.201307185SI.pdf [file 1307185110_pnas.201307185SI.pdf]

# Supporting Information

Yamaguchi et al. 10.1073/pnas.1307185110

## SI Materials and Methods

**Reagent for Flow Cytometric Analysis.** The following reagents were purchased from BD Biosciences: anti-CD4 (RM4-5), anti-CD8a (53-6.7), anti-CD11c (HL3), anti-CD25 (PC61), anti-CD40 (3/23), anti-CD80 (16-10A1), anti-CD86 (GL1), anti-I-A<sup>d</sup> (MHC class II; AMS-32.1), anti-Thy1.1 (OX-7), anti-Thy1.2 (53-2.1), anti-lymphocyte function-associated antigen-1 (LFA-1; M17/4), anti-intercellular adhesion molecule-1 (ICAM-1; 3E2), anti-DO11.10 T-cell receptor (TCR) (KJ-1.26), anti-TCR-V $\beta$ 2 (B20.6), V $\beta$ 3 (KJ25), V $\beta$ 5 (MR9-4), V $\beta$ 6 (RP4-7), V $\beta$ 8.1/8.2 (MR5-2), V $\beta$ 8.3 (1B3.3), V $\beta$ 11 (RR3-15), V $\beta$ 12 (MR11-1), V $\beta$ 14 (14-2), anti-cytotoxic T lymphocyte-associated antigen 4 (CTLA-4; UC10), anti-Ki-67 (35), anti-IL-4 (11B11), anti-IFN- $\gamma$  (XMG1.2), and control IgG. Anti-forkhead box p3 (Foxp3; FJK-16s) was purchased from eBioscience.

**Suppression Assay with Human T Cells. Lentiviral constructs, production, and concentration.** Reagents for production of lentivirus (BLOCK-iT Lentiviral Pol II miR RNAi Expression System with EmGFP for RNAi analysis and pLenti6/V5 Directional TOPO Cloning Kit for exogenous gene transduction) were purchased from Invitrogen. To knockdown human IL-2, artificial microRNA sequences were purchased from BLOCK-iT miR RNAi Select (Invitrogen). The DNA fragments for the microRNAs were inserted into the lentiviral vector pLenti6/V5 with GFP. To prepare lentivirus with human CTLA-4, the human *CTLA-4* gene was inserted into retroviral plasmid pGCSamIN (a gift from M. Onodera, Tsukuba University, Tsukuba, Japan), which contained internal ribosome entry site (IRES) and human truncated nerve growth factor receptor (NGFR). DNA fragments encoding human CTLA-4-IRES-NGFR were inserted into pLenti6/V5 TOPO vector. The pLenti6/V5 vectors containing DNA fragments for microRNAs or the *CTLA-4* gene were cotransfected into the 293FT cell line (Invitrogen) with the ViraPower Packaging Mix to produce lentivirus. Forty-eight hours after transfection, supernatant was collected by centrifugation at  $3,000 \times g$  for 10 min, filtered through a  $0.45\text{-}\mu\text{m}$  filter (Millipore), and subjected to ultracentrifugation at  $50,000 \times g$  at  $4^\circ\text{C}$  for 2 h (HITACHI-koki himac). The resulting lentivirus-containing medium was  $>70$ -fold concentrated and stored at  $-80^\circ\text{C}$  until use. One milliliter of the viral stocks could transduce genes into more than  $1 \times 10^7$  293FT cells.

**Lentiviral transduction into primary human T lymphocytes.** CD25<sup>-</sup>CD45RA<sup>+</sup>CD4<sup>+</sup> naive T cells were sorted with MoFlo from peripheral blood mononuclear cells (PBMCs) of healthy volunteers. To infect with lentivirus, sorted naive T cells were activated using Dynabeads Human T-Activator CD3/CD28 (Invitrogen) and adding 50 IU/mL human IL-2 every other day. Four days later, activated T cells were virus-infected by centrifuging at  $1,000 \times g$ ,  $32^\circ\text{C}$ , for 90 min in the presence of lentivirus (Virus number/target cell number was more than 10), 8  $\mu\text{g}/\text{mL}$  polybrene (Millipore), 200 IU/mL IL-2, and Dynabeads CD3/CD28 and by incubating for 6 h at  $37^\circ\text{C}$ . On the following day, viral infection was repeated in the same way; and on the next day, infected cells were sorted with MoFlo as GFP- and NGFR-

positive cells to prepare CTLA-4-transduced and knocked down IL-2 cells.

**Suppression assay with human T cells.** CFSE-labeled responder CD25<sup>-</sup>CD45RA<sup>+</sup>CD4<sup>+</sup> T cells ( $1 \times 10^4$ ) were cocultured with graded numbers of CD25<sup>high</sup>CD4<sup>+</sup> Treg cells or activated T cells with or without virus infection in the presence of  $2 \times 10^3$  nonirradiated allogeneic monocyte-derived DCs and 0.5  $\mu\text{g}/\text{mL}$  plate-bound anti-CD3 (OKT3) in 96-well round-bottom plates. Four days later, collected cells were stained with anti-CD4 and anti-Foxp3 and analyzed with Canto II. To generate monocyte-derived dendritic cells (DCs), CD14<sup>+</sup> monocytes were positively sorted from PBMCs by magnet sorting using magnetic beads-conjugated anti-CD14 (Milteny Biotec). Sorted CD14<sup>+</sup> cells were cultured in six-well plates with 50 ng/mL of recombinant GM-CSF (PeproTech) and 20 ng/mL of IL-4 (PeproTech); 6 d later, cultured cells were harvested and used as monocyte-derived DCs, which were negative for CD14 and positive for CD11c, CD80, and CD86.

**TCR Repertoire Analysis by Sequencing the CDR3 Region.** For sequencing of TCRJ $\alpha$ , CDR3 regions with TCRV $\alpha$ 10 were amplified from CD4SP thymocytes expressing DO11.10 transgenic TCR V $\beta$ . Thymocytes were stained with phycoerythrin-cyanin 7 (PE-Cy7)-conjugated anti-CD8, and then CD8<sup>+</sup> cells were depleted by panning with goat anti-rat IgG antibody-coated dishes (MP Biomedicals). The crude CD8<sup>-</sup> cells were further stained with antibodies specific for CD25, CD4, CD8, KJ-1.26, and TCRV $\beta$ 8.1/8.2. Among the CD4<sup>+</sup>CD8<sup>-</sup>KJ1.26<sup>low</sup> TCRV $\beta$ 8<sup>+</sup> fraction, CD25<sup>+</sup> and CD25<sup>-</sup> cells were sorted with MoFlo. From the lysates of sorted cells, RNA was purified with RNAeasy (QIAGEN), and cDNA was prepared with random primers and reverse transcriptase III (Invitrogen). TCR V $\alpha$ 10-containing fragments were amplified with nested PCR using a V $\alpha$ 10-specific primer (GACTCGTCAGCCTGTTCTACAATC) and common V $\alpha$  primer (CACAGGGAACGTCTGAACCTG) in the first PCR and the V $\alpha$ 10-specific primer (GACTCGTCAGCC-TGTTCTACAATC) and another common V $\alpha$  primer (ACAC-AGCAGTTCTGGGTTTC) in the second PCR. Amplified fragments were inserted into TA-cloning vector (Invitrogen) and transformed into *Escherichia coli* (DH-5 $\alpha$ ; TOYOBO), and colonies were picked up. The DNA sequence of amplified PCR products including the TCRJ $\alpha$  region were determined with a DNA sequencer (3130X/Genetic Analyzer; Applied Biosystems) and analysis software (Genetyx) referring to the *TCRa* sequence in National Center for Biotechnology Information (NCBI). Ninety-eight, 85, and 83 different sequences were determined from WT CD25<sup>-</sup>CD4SP thymocytes, WT CD25<sup>+</sup>CD4SP thymocytes, and CD25<sup>-</sup>CD4SP thymocytes from IL-2 gene KO (IL2KO)-C4Tg mice, respectively, by more than nine independent PCR amplifications from four mice per group. The determined J segments had at least 85% similarity to a particular TCR J $\alpha$  segment in the genome. TCR J $\alpha$  segments which occupy at least 3% as mean frequency or 5% as maximum frequency among the three populations are shown in Fig. S6B, and their correlation coefficient was calculated.

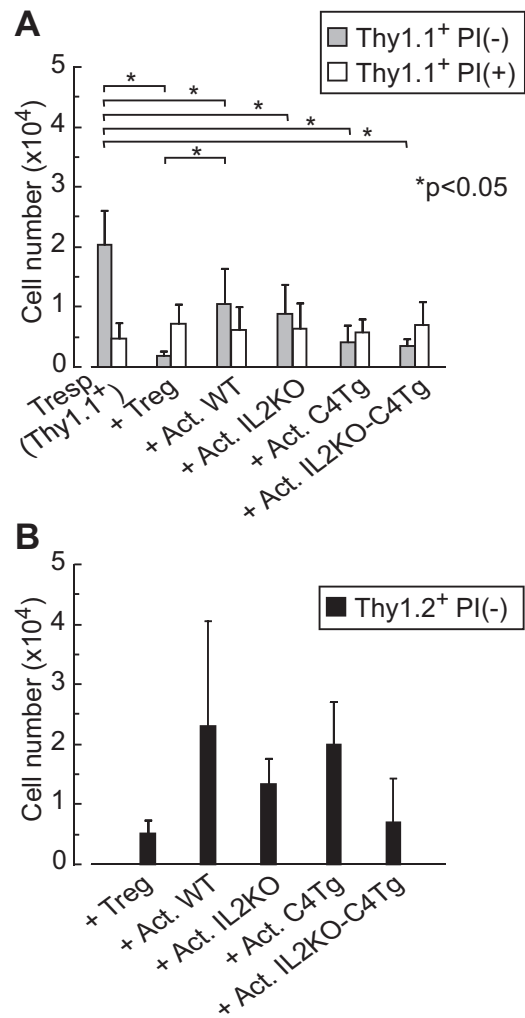

**Fig. S1.** Effects of suppressive T cells on the number of live or dead responder T cells. The number of propidium iodide (PI)-negative or PI-positive CFSE<sup>+</sup> Thy1.1<sup>+</sup> CD25<sup>-</sup> CD4<sup>+</sup> responder T cells (Tresp) cells (A) and PI-negative Thy1.2<sup>+</sup> cells (B) of indicated cell populations were analyzed after 3-d culture at 1:1 ratio as shown in Fig. 4B. The mean  $\pm$  SD of four independent experiments is shown. One-way ANOVA followed by Tukey-Kramer's posttest was used to analyze the difference.

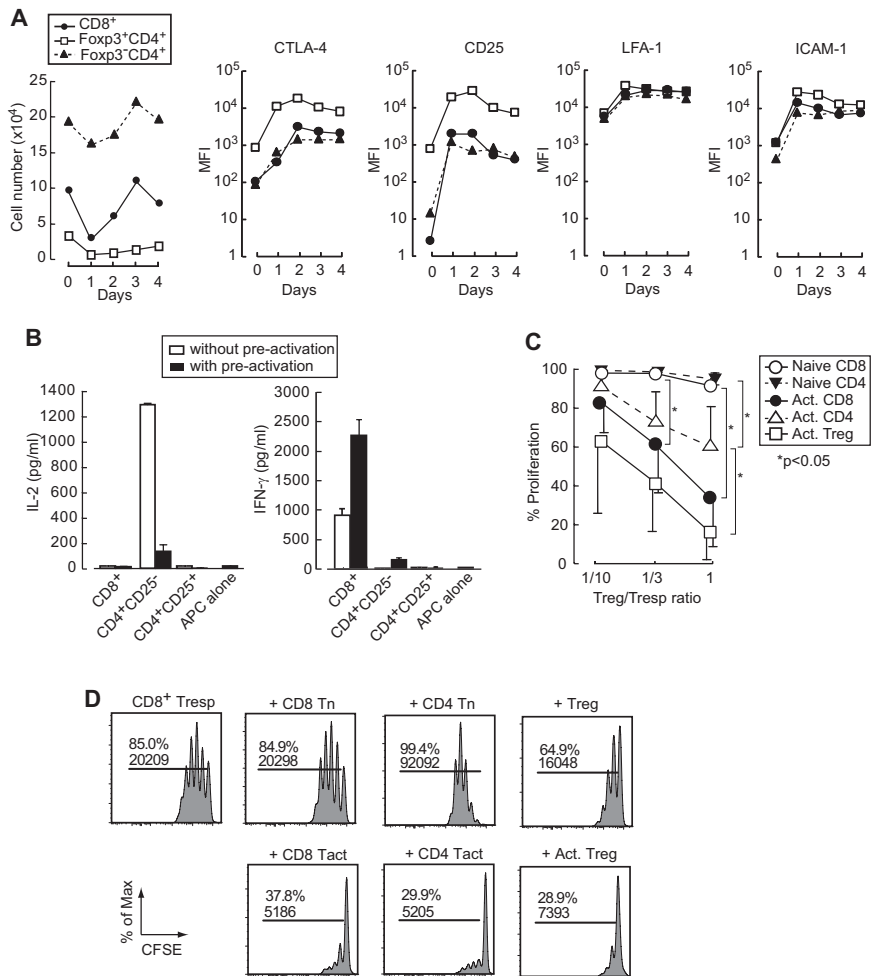

**Fig. S2.** Suppressive activity of conventional activated CD8<sup>+</sup> T cells. (A) Cell numbers and expression levels of intracellular CTLA-4 and cell surface CD25, LFA-1, and ICAM-1 (CD54) were compared among lymph node cell populations (CD8<sup>+</sup>, Fxp3<sup>+</sup>CD4<sup>+</sup>, and Fxp3<sup>-</sup>CD4<sup>+</sup> T cells) during in vitro activation for 4 d. Lymph node cells from Fxp3 reporter mice were stimulated with anti-CD3. (B) IL-2 and IFN- $\gamma$  concentration (mean  $\pm$  SD of triplicates) assessed by ELISA in the culture supernatants after 3-d culture. (C) Proliferation of Thy1.1<sup>+</sup>CD25<sup>-</sup>CD4<sup>+</sup> Tresp cells cocultured with graded numbers of designated populations of Thy1.2<sup>+</sup> cells. Proportions of dividing Tresp cells were normalized by the proliferation of Tresp cells alone. The means  $\pm$  SDs of three independent experiments are shown. Act., preactivated. \* $P < 0.05$  indicates significant difference in post hoc comparison for ANOVA. (D) CFSE intensity of dividing CFSE-labeled Thy1.1<sup>+</sup> CD8<sup>+</sup> Tresp cells cocultured with the same number of designated T-cell populations. Representative results of three independent experiments are shown in A, B, and D. The results show that activated CD8<sup>+</sup> T cells and, to a lesser extent, activated CD4<sup>+</sup> T cells exhibit significant in vitro suppressive activity when they cease IL-2 production but still express CTLA-4 (e.g., 3 d after in vitro anti-CD3 stimulation).

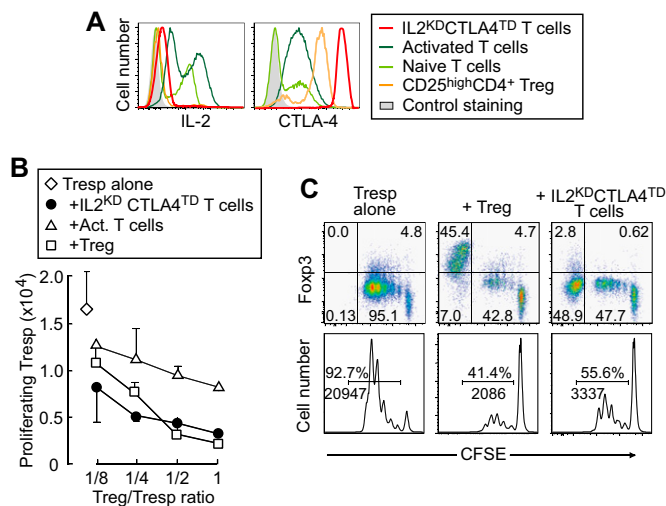

**Fig. S3.** Suppressive activity of IL-2 knockdown and CTLA-4-transduced human CD4<sup>+</sup> T cells. *(A)* Intracellular IL-2 and CTLA-4 expression by indicated human CD4<sup>+</sup> T cells after stimulation with phorbol 12-myristate 13-acetate (PMA) and ionomycin. CD25<sup>-</sup>CD45RA<sup>+</sup>CD4<sup>+</sup> naive T cells and CD25<sup>high</sup>CD4<sup>+</sup> Treg cells were sorted from human peripheral blood. IL2<sup>KD</sup>CTLA4<sup>TD</sup> T cells indicate IL-2 knockdown and CTLA-4-transduced activated CD4<sup>+</sup> T cells, which were derived from CD25<sup>-</sup>CD45RA<sup>+</sup>CD4<sup>+</sup> naive T cells, activated with anti-CD3 and anti-CD28, and infected with lentivirus expressing siRNA against *IL-2* and mRNA for *CTLA-4*. *(B)* The number of proliferating CFSE-labeled human CD25<sup>-</sup>CD45RA<sup>+</sup>CD4<sup>+</sup> naive Tresp cells in the presence of graded numbers of indicated populations. *(C)* CFSE and Foxp3 expression by CD4<sup>+</sup> T cells (*Upper*) and CFSE intensity of CFSE<sup>+</sup> CD4<sup>+</sup> T cells (*Lower*) are shown with the percentages (*Upper* and *Lower*) and cell numbers (*Lower*) in gated areas. Results are representative of three independent experiments.

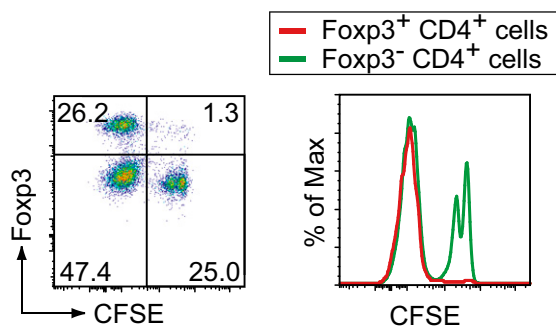

**Fig. S4.** Proliferation of Foxp3<sup>+</sup> Treg cells in RAG2<sup>-/-</sup> mice. CFSE-labeled CD4<sup>+</sup> T cells (1 × 10<sup>6</sup>) were transferred into RAG2<sup>-/-</sup> mice and CD4<sup>+</sup>TCRβ<sup>+</sup> T cells in inguinal lymph nodes were stained 7 d later for CFSE and Foxp3 (*Left*). CFSE staining of Foxp3<sup>+</sup>CD4<sup>+</sup>TCRβ<sup>+</sup> cells and Foxp3<sup>-</sup>CD4<sup>+</sup>TCRβ<sup>+</sup> cells is shown on *Right*. Numbers indicate the percentages in gated areas. Representative of three independent experiments.

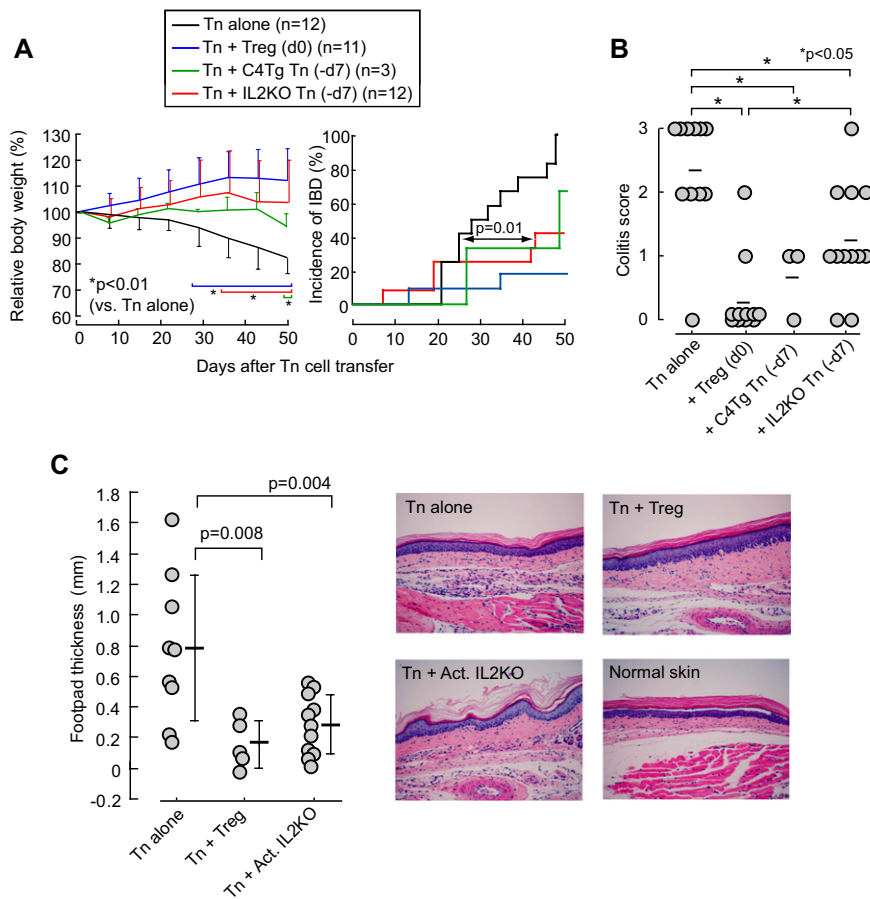

**Fig. 55.** In vivo suppressive activity of IL-2KO T cells. (A and B) Suppression of colitis in  $RAG2^{-/-}$  mice by pretransfer of C4Tg and IL2KO T cells. (A) Body weight change (mean  $\pm$  SD) (Left) and incidence of IBD (Right) depicted as diarrhea in  $RAG2^{-/-}$  mice transferred with WT  $CD45RB^{high}CD4^{+}$  Tn cells alone on day 0 (black lines), WT  $CD25^{+}CD4^{+}$  Treg cells and WT  $CD45RB^{high}CD4^{+}$  Tn cells on day 0 (blue lines), C4Tg  $CD45RB^{high}CD25^{-}CD4^{+}$  T cells 7 d earlier (-d7) and WT  $CD45RB^{high}CD4^{+}$  Tn cells on day 0 (green lines), or IL2KO  $CD45RB^{high}CD25^{-}CD4^{+}$  T cells 7 d earlier (-d7) and WT  $CD45RB^{high}CD4^{+}$  Tn cells on day 0 (red lines). Cell dose was all  $1 \times 10^5$ . (B) Histological score of colitis in each group of recipient mice. Horizontal bars indicate the means. Data are pooled from seven independent experiments. \* $P < 0.05$  indicates significant difference in post hoc comparison for ANOVA. (C) Suppression of delayed type hypersensitivity reaction by activated IL2KO T cells. Athymic BALB/c nude mice were transferred with  $1 \times 10^6$   $CD25^{-}CD4^{+}$  naive T cells from DO11.10 TCR transgenic mice together with the same numbers of  $CD25^{+}CD4^{+}$  Treg cells from DO11.10 mice or preactivated  $CD4^{+}$  T cells from DO11.10 IL2KO mice. On the same day, mice were immunized by s.c. injection of 100  $\mu$ g ovalbumin (OVA) protein emulsified in 50  $\mu$ L complete Freund's adjuvant; 7 d later, 100  $\mu$ g OVA protein in PBS was injected into right footpad of the immunized nude mice; and thickness of food pads was measured 24 h later. The preactivated IL2KO  $CD4^{+}$  T cells were prepared from lymph nodes and spleens of DO11.10 IL2KO  $RAG2^{-/-}$  mice by stimulation with OVA<sub>322-339</sub> peptide and 100 U/mL of IL-2 for 4 d. Each dot indicates the difference of thickness between immunized right footpad and left footpad in each mouse. Bars indicate mean  $\pm$  SD. Representative H&E-stained histology of footpads is also shown.

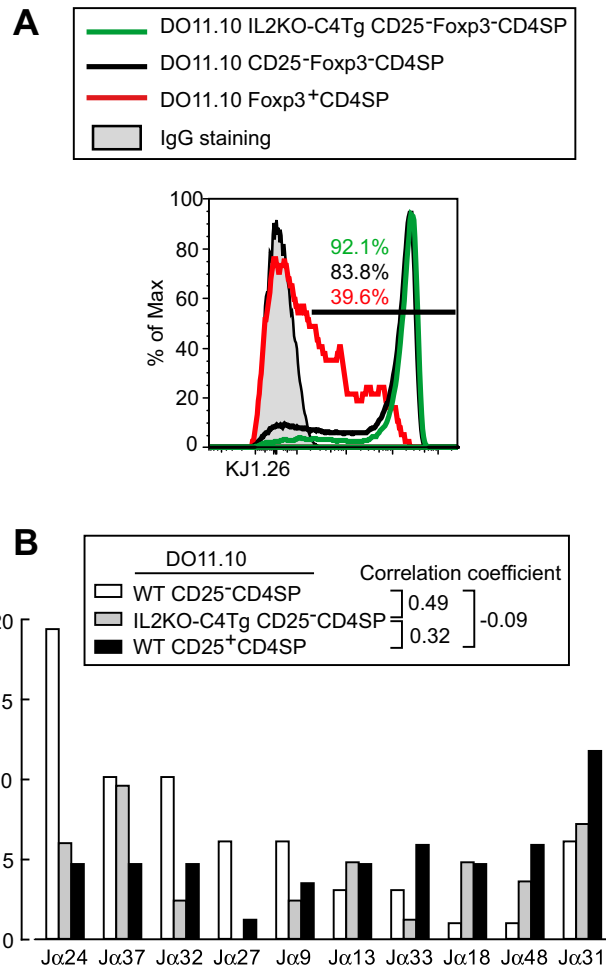

**Fig. 56.** CTLA-4-dependent self-skewing of TCR repertoire in developing T cells. (A) Staining of DO11.10 Foxp3<sup>+</sup> or CD25<sup>-</sup>Foxp3<sup>-</sup> CD4SP thymocytes and DO11.10 IL2KO-C4Tg CD25<sup>-</sup>Foxp3<sup>-</sup> CD4SP thymocytes with KJ1.26, an antibody specific for the DO11.10 transgenic TCR clonotype. (B) Proportions of thymocytes using indicated TCR  $\alpha$  among CD4SP thymocyte populations (IL2KO-C4Tg CD25<sup>-</sup>, WT CD25<sup>-</sup>, and WT CD25<sup>+</sup>) expressing DO11.10 transgenic TCR $\beta$  and endogenous TCR V $\alpha$ 10 were evaluated by PCR and sequencing. Summary of nine experiments is shown with correlation coefficients in *Inset*.

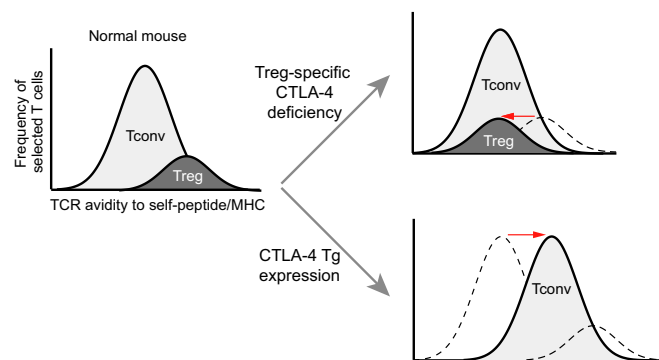

**Fig. 57.** Effect of CTLA-4 expression on selection of self-reactive TCR-expressing T cells in the thymus. In normal mice, Treg cells are more self-reactive than conventional T cells in the TCR repertoire. Regulatory T (Treg) cell-specific CTLA-4 deficiency cancels this self-skewing in the Treg TCR repertoire. On the other hand, in CTLA-4 transgenic mice, the TCR repertoire of conventional T cells is skewed to be more self-reactive than in normal mice, whereas Treg cells are not generated, presumably because of marked CD28 signal reduction due to high CTLA-4 expression.

**Table S1. Primers list for quantitative PCR analysis**

| Gene name                                       | Primer sequences                                      |
|-------------------------------------------------|-------------------------------------------------------|
| <i>Cd25 (Il2receptor<math>\alpha</math>)</i>    | CTGATCCCATGTGCCAGGAA and AGGGCTTTGAATGTGGCATTG        |
| <i>Itgb8 (integrin<math>\beta</math>8)</i>      | ACTTCTCCTGTCCCTATCTCCA and ATCTGCCACCTTCACACTCC       |
| <i>Ctla4 (Cd152)</i>                            | CCTCTGCAAGGTGGAACATCATGTA and AGCTAACTGCGACAAGGATCCAA |
| <i>Cd39 (Entpd1)</i>                            | GCAAGCAGAGACAGCAAAAAC and GCAAAATCTCTTCACCTTAGAATCC   |
| <i>Lag-3 (Cd223)</i>                            | TCTCCATCACGTACAACCTCA and GCAGCGTACACTGTGACAGAGG      |
| <i>Pd-1 (programmed cell death 1)</i>           | TGCAGTTGAGCTGGCAAT and GGCTGGGTAGAAGGTGAGG            |
| <i>Galectin-1</i>                               | CTCTCGGGTGGAGTCTTCTG and GGTTTGAGATTGAGTTGCTG         |
| <i>Cd73 (Nt5e)</i>                              | ATGAACATCCTGGGCTACGA and GTCCTCCACACCGTTATCAA         |
| <i>Icam1 (Cd54)</i>                             | CAATTCACACTGAATGCCAGCTC and CAAGCAGTCCGTCTCGTCCA      |
| <i>Cd69</i>                                     | GGAAAATAGCTCTTCACATCTGG and TGATGCTTCTCAAAATGTATACTGG |
| <i>Itgb2 (CD18)</i>                             | GTGGTGACAGTCAAGAA and GCTGTGGTCCAGGAAGACTC            |
| <i>Fasl (Cd178)</i>                             | ACCGGTGGTATTTTTCATGG and AGGCTTTGGTTGGTGAAGCTC        |
| <i>Il10</i>                                     | TTTGAATTCCTCGGGTGAGAA and ACAGGGGAGAAATCGATGACA       |
| <i>Gzmb (GranzymeB)</i>                         | GCTGCTCACTGTGAAGGAAGT and TGGGGAATGCATTTTACCAT        |
| <i>Il4</i>                                      | TCTCGAATGTACCAGGAGCCATATC and AGCACCTTGAAGCCCTACAGA   |
| <i>Il17a</i>                                    | ACGCGCAAACATGAGTCCAG and CTCAGCAGCAGCAACAGCATC        |
| <i>Nos3as (eNOS)</i>                            | CTGAGATGAGCCTCCACGCTATTTA and CAGGTGAGCCTGGCTGTGAA    |
| <i>Il2</i>                                      | GGAGCAGCTGTTGATGGACCTAC and AATCCAGAACATGCCGAGAG      |
| <i>Il-12a</i>                                   | CCATCAGCAGATCATTCTAGACAA and CGCCATTATGATTGAGAGACTG   |
| <i>Ebi3 (Epstein-Barr virus induced gene 3)</i> | GCTCCCTGGTTACTACTGAA and ACGGGATACCGAGAAGCAT          |
| <i>INF<math>\gamma</math></i>                   | TCAAGTGGCATAGATGTGGAAGA and TGGCTCTGCAGGATTTTCATG     |
| <i>Tgfb1</i>                                    | GTGTGGAGCAACATGTGGAACCTTA and TTGGTTCAGCCACTGCCGTA    |
| <i>Prf (perforin)</i>                           | GCTCTTCGGGAACCAAGCTA and CAGGGTTGCTGGGCAGTG           |
| <i>Socs2</i>                                    | CGCGAGCTCAGTCAAACAG and AGTTCCTTCTGGAGCCTCTTTT        |
| <i>Foxp3</i>                                    | CCCAGGAAAGACAGCAACCTT and TTCTCACAACCAGGCCACTTG       |
| <i>Eos (Ikzf4)</i>                              | CTCAGCACTGATGCCCAAG and CATCTCCAGGTACCGGATT           |
| <i>Pde3b</i>                                    | GGGACTTGAAGCAGTGGTGT and TTAGCACTGAAAGATCAACTCCAT     |
| <i>Cd4</i>                                      | CAGCATGGCAAAGGTGATTAATTAG and CCCATGCCCTTTTTTGG       |
